# Supplementary material
Source: PubMed Central journal article supplement (PMC3347176)
Supplement: supp_194.10.2501_TableS1_FigS1-S3.pdf [file supp_194.10.2501_TableS1_FigS1-S3.pdf]

## Supplemental Material

1  
2  
3  
4  
5  
6

**Table S1. Oligonucleotides used in this study.** Boldface: annealing nucleotides, italicized: restriction sites, capital letters: Shine-Dalgarno or His-tag sequences.

| Primer             | Sequence                                                                              |
|--------------------|---------------------------------------------------------------------------------------|
| bamY_Bam+SDGm_for  | tcccgggatcc <b>TA</b> ACTAGCTAGCCGGAGGTCCACA <b>atgcc</b><br><b>ctacaatctcaacctgc</b> |
| bamY_Hind+cHis_rev | cagtccaagcttcaGTGATGGT <b>GATGGT</b> GATG <b>ggccacgtgc</b><br><b>tgcaactc</b>        |
| Gm_act-pET/D_for   | caccat <b>gaacaaccaactg</b> ttgagc                                                    |
| Gm_act-pET/D_rev   | <b>ttg</b> aat <b>cg</b> tgactccattc <b>gg</b>                                        |
| bamYDelHind_for    | catcccaagctt <b>ctgc</b> ctcaacaccat <b>gaacc</b>                                     |
| bamYDelXba_rev     | ggctag <b>ctaga</b> atccc <b>g</b> tcgagaat <b>gtccag</b>                             |
| R24                | <b>agcggataacaattc</b> acacagga                                                       |
| F24                | <b>cgccagggtttcc</b> cagtcacgac                                                       |
| Sm_for_BgIII       | ggatcaagatc <b>ttg</b> aat <b>cg</b> aactaatat <b>ttttttgg</b>                        |
| Sm_rev_BgIII       | gtgatcagat <b>ctct</b> agtat <b>gacgtctgtcgcac</b>                                    |

1 **Fig. S1. Growth of *G. metallireducens* on solid medium.** Single colonies formed  
2 after 4-6 days on agar containing mineral medium under a N<sub>2</sub>/CO<sub>2</sub> atmosphere  
3 (80:20, by vol.) with benzoate as electron donor and nitrate as electron acceptor.

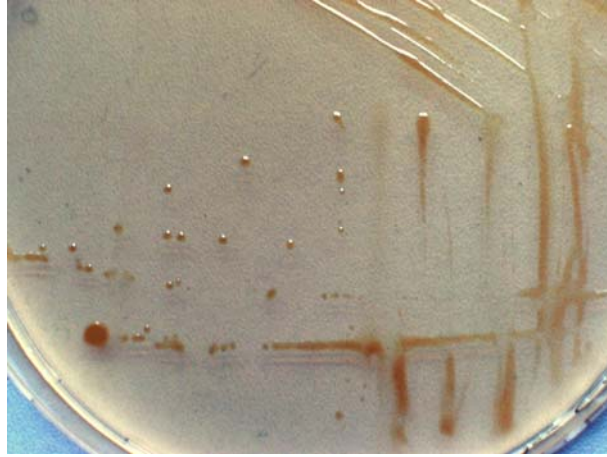

4  
5  
6  
7  
8  
9  
10  
11  
12  
13  
14  
15  
16  
17

1 **Fig. S2 SDS-PAGE analysis of homologous *bamY* expression.** **A** Cell extracts of  
2 *G. metallireducens* grown on acetate/nitrate with (+) and without (-) plasmid  
3 pCD*bamY* carrying *bamY* for homologous expression. **B** Purified His-tagged BamY  
4 after homologous expression.  
5

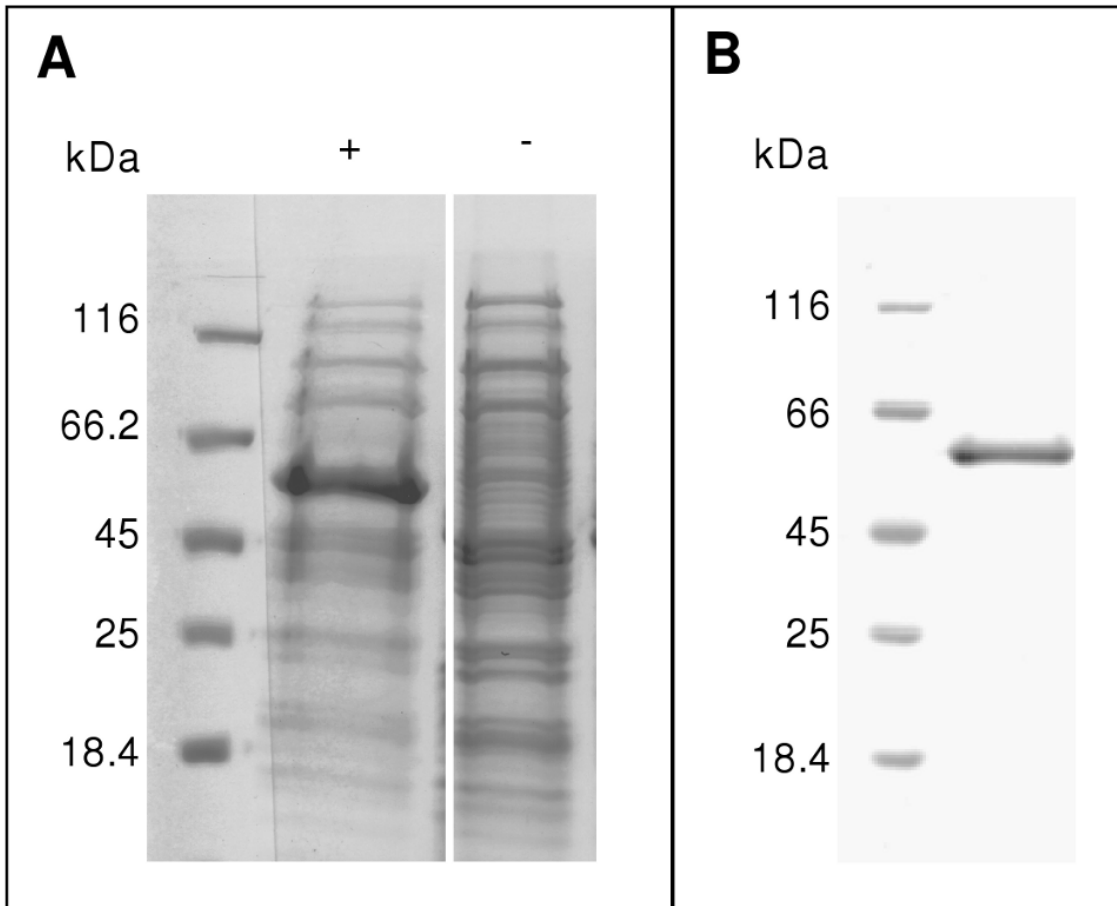

6  
7  
8

1 **Fig. S3 Disruption of *bamY* via homologous recombination and PCR analysis of**  
2 **the resulting *bamY::kan* mutant. A** A central 672 bp fragment of *bamY* (*bamY'*)  
3 was inserted into plasmid pK18*mob* which subsequently recombined with the *G.*  
4 *metallireducens* chromosome resulting in the insertion of the plasmid into *bamY*.  
5 Arrows and numbers indicate primers used for control PCRs for verifying correct  
6 gene disruption. **B** Agarose gels of control PCR products: L, DNA ladder; **1**, full-  
7 length wild type *bamY* (1.5 kb) using primers P1 and P4; **2**, PCR-product obtained  
8 with primers P1 and P2, and, **3**, P3 and P4. **C** Agarose gel of Phusion™-PCRs  
9 amplifying full length *bamY* using genomic DNA from the mutant strain (mut) and the  
10 wild type (wt). The sizes of the PCR products differed by the size of the plasmid  
11 integrated in the mutant strain. For primers used see Table S1 in the supplemental  
12 data.

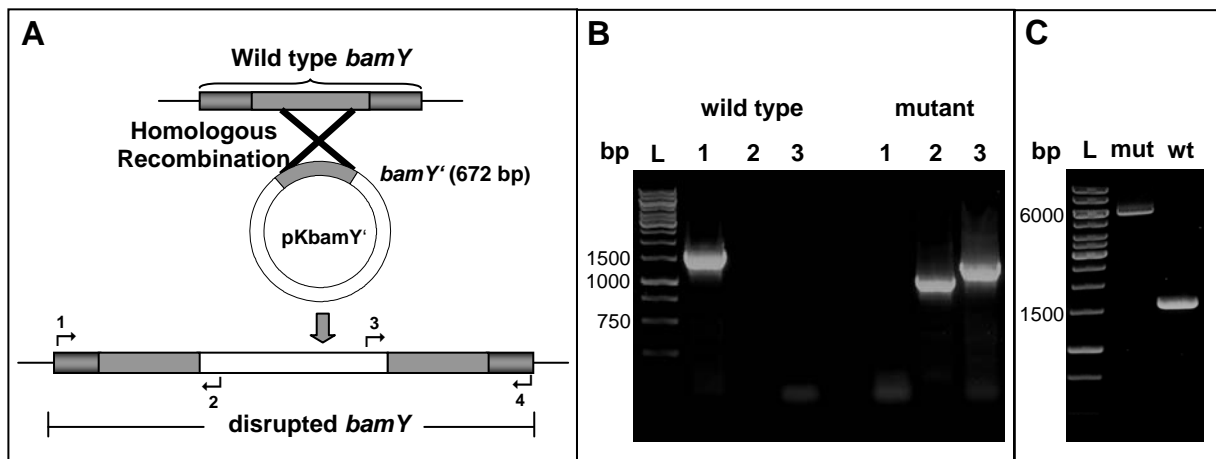

1  
2
